# Supplementary material for: OrganPipe: An automated tool to facilitate the assembly, annotation, and curation of mitochondrial and chloroplast genomes
Source: Research Square preprint supplement (doi:10.21203/rs.3.rs-5686696/v1), 2025-01-13
Supplement: Supplementary file 2 [file c753b04a252a315b0ec6e600.xlsx]

## Sheet: Mito
Samples	Species	Seeds	K-mers	Circularization	Annotation	Seed Input
ITV57671	Eulimnadia colombiensis	16S – Eulimnadia braueriana (EF189604)	23	Yes	22 tRNA, 13 CDS, 2 rRNA	NCBI Automatic search by taxon
			33	Yes	22 tRNA, 13 CDS, 2 rRNA
			39	Yes	22 tRNA, 13 CDS, 2 rRNA
		cox1 - Eulimnadia africana (FJ499220)	23	Yes	22 tRNA, 13 CDS, 2 rRNA
			33	Yes	22 tRNA, 13 CDS, 2 rRNA
			39	No
		cox1 - Eulimnadia diversa (FJ499219)	23	Yes	22 tRNA, 13 CDS, 2 rRNA
			33	Yes	22 tRNA, 13 CDS, 2 rRNA
			39	No
		cox1 - Eulimnadia sp. 2 WRH-2009 (FJ499217)	23	Yes	22 tRNA, 13 CDS, 2 rRNA
			33	Yes	22 tRNA, 13 CDS, 2 rRNA
			39	No
		cox1 - Eulimnadia sp. BOLD:AAU6390 (JN294853)	23	Yes	22 tRNA, 13 CDS, 2 rRNA
			33	Yes	22 tRNA, 13 CDS, 2 rRNA
			39	No
		cox1 - Eulimnadia sp. C MS-2015 (KP754153)	23	Yes	22 tRNA, 13 CDS, 2 rRNA
			33	Yes	22 tRNA, 13 CDS, 2 rRNA
			39	No
		cytB – Eulimnadia magdalenensis (AY779731)	23	No
			33	No
			39	No
		cytB – Eulimnadia packardiana (AY779726)	23	No
			33	No
			39	No
		cytB – Eulimnadia braueriana (AY779724)	23	No
			33	No
			39	No
		cytB – Eulimnadia sp. WRH-2004 (AY779723)	23	No
			33	No
			39	No
		cytB – Eulimnadia colombiensis (KM923819)	23	No
			33	No
			39	No
ITV57672	Eulimnadia colombiensis	16S – Eulimnadia braueriana (EF189604)	23	Yes	22 tRNA, 13 CDS, 2 rRNA	NCBI Automatic search by taxon
			33	Yes	22 tRNA, 13 CDS, 2 rRNA
			39	Yes	22 tRNA, 13 CDS, 2 rRNA
		cox1 - Eulimnadia africana (FJ499220)	23	Yes	22 tRNA, 13 CDS, 2 rRNA
			33	Yes	22 tRNA, 13 CDS, 2 rRNA
			39	Yes	22 tRNA, 13 CDS, 2 rRNA
		cox1 - Eulimnadia diversa (FJ499219)	23	Yes	22 tRNA, 13 CDS, 2 rRNA
			33	Yes	22 tRNA, 13 CDS, 2 rRNA
			39	Yes	22 tRNA, 13 CDS, 2 rRNA
		cox1 - Eulimnadia sp. 2 WRH-2009 (FJ499217)	23	Yes	22 tRNA, 13 CDS, 2 rRNA
			33	Yes	22 tRNA, 13 CDS, 2 rRNA
			39	Yes	22 tRNA, 13 CDS, 2 rRNA
		cox1 - Eulimnadia sp. BOLD:AAU6390 (JN294853)	23	Yes	22 tRNA, 13 CDS, 2 rRNA
			33	Yes	22 tRNA, 13 CDS, 2 rRNA
			39	Yes	22 tRNA, 13 CDS, 2 rRNA
		cox1 - Eulimnadia sp. C MS-2015 (KP754153)	23	Yes	22 tRNA, 13 CDS, 2 rRNA
			33	Yes	22 tRNA, 13 CDS, 2 rRNA
			39	Yes	22 tRNA, 13 CDS, 2 rRNA
		cytB – Eulimnadia magdalenensis (AY779731)	23	No
			33	No
			39	No
		cytB – Eulimnadia packardiana (AY779726)	23	No
			33	No
			39	No
		cytB – Eulimnadia braueriana (AY779724)	23	No
			33	No
			39	No
		cytB – Eulimnadia sp. WRH-2004 (AY779723)	23	No
			33	No
			39	No
		cytB – Eulimnadia colombiensis (KM923819)	23	No
			33	No
			39	No
ITV57673	Eulimnadia colombiensis	16S – Eulimnadia braueriana (EF189604)	23	Yes	22 tRNA, 13 CDS, 2 rRNA	NCBI Automatic search by taxon
			33	Yes	22 tRNA, 13 CDS, 2 rRNA
			39	Yes	22 tRNA, 13 CDS, 2 rRNA
		cox1 - Eulimnadia africana (FJ499220)	23	Yes	22 tRNA, 13 CDS, 2 rRNA
			33	Yes	22 tRNA, 13 CDS, 2 rRNA
			39	Yes	22 tRNA, 13 CDS, 2 rRNA
		cox1 - Eulimnadia diversa (FJ499219)	23	Yes	22 tRNA, 13 CDS, 2 rRNA
			33	Yes	22 tRNA, 13 CDS, 2 rRNA
			39	Yes	22 tRNA, 13 CDS, 2 rRNA
		cox1 - Eulimnadia sp. 2 WRH-2009 (FJ499217)	23	Yes	22 tRNA, 13 CDS, 2 rRNA
			33	Yes	22 tRNA, 13 CDS, 2 rRNA
			39	Yes	22 tRNA, 13 CDS, 2 rRNA
		cox1 - Eulimnadia sp. BOLD:AAU6390 (JN294853)	23	Yes	22 tRNA, 13 CDS, 2 rRNA
			33	Yes	22 tRNA, 13 CDS, 2 rRNA
			39	Yes	22 tRNA, 13 CDS, 2 rRNA
		cox1 - Eulimnadia sp. C MS-2015 (KP754153)	23	Yes	22 tRNA, 13 CDS, 2 rRNA
			33	Yes	22 tRNA, 13 CDS, 2 rRNA
			39	Yes	22 tRNA, 13 CDS, 2 rRNA
		cytB – Eulimnadia magdalenensis (AY779731)	23	No
			33	No
			39	No
		cytB – Eulimnadia packardiana (AY779726)	23	No
			33	No
			39	No
		cytB – Eulimnadia braueriana (AY779724)	23	No
			33	No
			39	No
		cytB – Eulimnadia sp. WRH-2004 (AY779723)	23	No
			33	No
			39	No
		cytB – Eulimnadia colombiensis (KM923819)	23	No
			33	No
			39	No
ITV57674	Eulimnadia colombiensis	16S – Eulimnadia braueriana (EF189604)	23	Yes	22 tRNA, 13 CDS, 2 rRNA	NCBI Automatic search by taxon
			33	Yes	22 tRNA, 13 CDS, 2 rRNA
			39	Yes	22 tRNA, 13 CDS, 2 rRNA
		cox1 - Eulimnadia africana (FJ499220)	23	Yes	22 tRNA, 13 CDS, 2 rRNA
			33	Yes	22 tRNA, 13 CDS, 2 rRNA
			39	Yes	22 tRNA, 13 CDS, 2 rRNA
		cox1 - Eulimnadia diversa (FJ499219)	23	Yes	22 tRNA, 13 CDS, 2 rRNA
			33	Yes	22 tRNA, 13 CDS, 2 rRNA
			39	Yes	22 tRNA, 13 CDS, 2 rRNA
		cox1 - Eulimnadia sp. 2 WRH-2009 (FJ499217)	23	Yes	22 tRNA, 13 CDS, 2 rRNA
			33	Yes	22 tRNA, 13 CDS, 2 rRNA
			39	Yes	22 tRNA, 13 CDS, 2 rRNA
		cox1 - Eulimnadia sp. BOLD:AAU6390 (JN294853)	23	Yes	22 tRNA, 13 CDS, 2 rRNA
			33	Yes	22 tRNA, 13 CDS, 2 rRNA
			39	Yes	22 tRNA, 13 CDS, 2 rRNA
		cox1 - Eulimnadia sp. C MS-2015 (KP754153)	23	Yes	22 tRNA, 13 CDS, 2 rRNA
			33	Yes	22 tRNA, 13 CDS, 2 rRNA
			39	Yes	22 tRNA, 13 CDS, 2 rRNA
		cytB – Eulimnadia magdalenensis (AY779731)	23	No
			33	No
			39	No
		cytB – Eulimnadia packardiana (AY779726)	23	No
			33	No
			39	No
		cytB – Eulimnadia braueriana (AY779724)	23	No
			33	No
			39	No
		cytB – Eulimnadia sp. WRH-2004 (AY779723)	23	No
			33	No
			39	No
		cytB – Eulimnadia colombiensis (KM923819)	23	No
			33	No
			39	No
ITV57675	Eulimnadia colombiensis	16S – Eulimnadia braueriana (EF189604)	23	Yes	22 tRNA, 13 CDS, 2 rRNA	NCBI Automatic search by taxon
			33	Yes	22 tRNA, 13 CDS, 2 rRNA
			39	Yes	22 tRNA, 13 CDS, 2 rRNA
		cox1 - Eulimnadia africana (FJ499220)	23	Yes	22 tRNA, 13 CDS, 2 rRNA
			33	Yes	22 tRNA, 13 CDS, 2 rRNA
			39	Yes	22 tRNA, 13 CDS, 2 rRNA
		cox1 - Eulimnadia diversa (FJ499219)	23	Yes	22 tRNA, 13 CDS, 2 rRNA
			33	Yes	22 tRNA, 13 CDS, 2 rRNA
			39	Yes	22 tRNA, 13 CDS, 2 rRNA
		cox1 - Eulimnadia sp. 2 WRH-2009 (FJ499217)	23	Yes	22 tRNA, 13 CDS, 2 rRNA
			33	Yes	22 tRNA, 13 CDS, 2 rRNA
			39	Yes	22 tRNA, 13 CDS, 2 rRNA
		cox1 - Eulimnadia sp. BOLD:AAU6390 (JN294853)	23	Yes	22 tRNA, 13 CDS, 2 rRNA
			33	Yes	22 tRNA, 13 CDS, 2 rRNA
			39	Yes	22 tRNA, 13 CDS, 2 rRNA
		cox1 - Eulimnadia sp. C MS-2015 (KP754153)	23	Yes	22 tRNA, 13 CDS, 2 rRNA
			33	Yes	22 tRNA, 13 CDS, 2 rRNA
			39	Yes	22 tRNA, 13 CDS, 2 rRNA
		cytB – Eulimnadia magdalenensis (AY779731)	23	Yes	22 tRNA, 13 CDS, 2 rRNA
			33	Yes	22 tRNA, 13 CDS, 2 rRNA
			39	Yes	22 tRNA, 13 CDS, 2 rRNA
		cytB – Eulimnadia packardiana (AY779726)	23	Yes	22 tRNA, 13 CDS, 2 rRNA
			33	Yes	22 tRNA, 13 CDS, 2 rRNA
			39	No
		cytB – Eulimnadia braueriana (AY779724)	23	Yes	22 tRNA, 13 CDS, 2 rRNA
			33	Yes	22 tRNA, 13 CDS, 2 rRNA
			39	No
		cytB – Eulimnadia sp. WRH-2004 (AY779723)	23	Yes	22 tRNA, 13 CDS, 2 rRNA
			33	Yes	22 tRNA, 13 CDS, 2 rRNA
			39	Yes	22 tRNA, 13 CDS, 2 rRNA
		cytB – Eulimnadia colombiensis (KM923819)	23	Yes	22 tRNA, 13 CDS, 2 rRNA
			33	Yes	22 tRNA, 13 CDS, 2 rRNA
			39	Yes	22 tRNA, 13 CDS, 2 rRNA
ITV19301	Pyrearinus pumilus	atp6 – Pyrearinus termitilluminans (NC_030059)	23	Yes	21 tRNA, 13 CDS, 2 rRNA (trnY missing)	NCBI Automatic search by taxon
			33	No
			39	Yes	21 tRNA, 13 CDS, 2 rRNA (trnY missing)
		cytB – Pyrearinus termitilluminans (NC_030059)	23	Yes	21 tRNA, 13 CDS, 2 rRNA (trnY missing)
			33	Yes	21 tRNA, 13 CDS, 2 rRNA (trnY missing)
			39	Yes	21 tRNA, 13 CDS, 2 rRNA (trnY missing)
		nad1 – Pyrearinus termitilluminans (NC_030059)	23	No
			33	Yes	21 tRNA, 13 CDS, 2 rRNA (trnY missing)
			39	Yes	21 tRNA, 13 CDS, 2 rRNA (trnY missing)
		nad4 – Pyrearinus termitilluminans (NC_030059)	23	Yes	21 tRNA, 13 CDS, 2 rRNA (trnY missing)
			33	Yes	21 tRNA, 13 CDS, 2 rRNA (trnY missing)
			39	Yes	21 tRNA, 13 CDS, 2 rRNA (trnY missing)
ITV50378	Pyrearinus pumilus	atp6 – Pyrearinus termitilluminans (NC_030059)	23	Yes	21 tRNA, 13 CDS, 2 rRNA (trnY missing)	NCBI Automatic search by taxon
			33	Yes	21 tRNA, 13 CDS, 2 rRNA (trnY missing)
			39	Yes	21 tRNA, 13 CDS, 2 rRNA (trnY missing)
		cytB – Pyrearinus termitilluminans (NC_030059)	23	Yes	21 tRNA, 13 CDS, 2 rRNA (trnY missing)
			33	Yes	21 tRNA, 13 CDS, 2 rRNA (trnY missing)
			39	Yes	21 tRNA, 13 CDS, 2 rRNA (trnY missing)
		nad1 – Pyrearinus termitilluminans (NC_030059)	23	Yes	21 tRNA, 13 CDS, 2 rRNA (trnY missing)
			33	Yes	21 tRNA, 13 CDS, 2 rRNA (trnY missing)
			39	Yes	21 tRNA, 13 CDS, 2 rRNA (trnY missing)
		nad4 – Pyrearinus termitilluminans (NC_030059)	23	Yes	21 tRNA, 13 CDS, 2 rRNA (trnY missing)
			33	Yes	21 tRNA, 13 CDS, 2 rRNA (trnY missing)
			39	Yes	21 tRNA, 13 CDS, 2 rRNA (trnY missing)

## Sheet: Chloro
Samples	Species	Seeds	K-mers	Circularization	Annotation	Seed Input
ITV582	Melanoxylon brauna	trnK-matK – Melanoxylon brauna (KU245657)	23	Yes	22 tRNA, 74 CDS, 4 rRNA	Multi-Fasta file
			33	Yes	22 tRNA, 74 CDS, 4 rRNA
			39	Yes	22 tRNA, 74 CDS, 4 rRNA
		trnK-matK – Melanoxylon brauna (EU362000)	23	Yes	22 tRNA, 74 CDS, 4 rRNA
			33	Yes	22 tRNA, 74 CDS, 4 rRNA
			39	Yes	22 tRNA, 74 CDS, 4 rRNA
		rbcL – Melanoxylon brauna (AY904388)	23	Yes	22 tRNA, 74 CDS, 4 rRNA
			33	Yes	22 tRNA, 74 CDS, 4 rRNA
			39	Yes	22 tRNA, 74 CDS, 4 rRNA
		trnL-trnF – Melanoxylon brauna (AY899700)	23	Yes	22 tRNA, 74 CDS, 4 rRNA
			33	Yes	22 tRNA, 74 CDS, 4 rRNA
			39	Yes	22 tRNA, 74 CDS, 4 rRNA
		rps16 – Melanoxylon brauna (AY899757)	23	Yes	22 tRNA, 74 CDS, 4 rRNA
			33	Yes	22 tRNA, 74 CDS, 4 rRNA
			39	Yes	22 tRNA, 74 CDS, 4 rRNA
		trnL – Melanoxylon brauna (EU361822)	23	Yes	22 tRNA, 74 CDS, 4 rRNA
			33	Yes	22 tRNA, 74 CDS, 4 rRNA
			39	No
ITV8189	Furtadoa mixta	matK – Furtadoa mixta (FR832766)	23	Yes	22 tRNA, 77 CDS, 3 rRNA (rrn3.5 missing)	Multi-Fasta file
			33	Yes	22 tRNA, 78 CDS, 3 rRNA (rrn3.5 missing)
			39	No
		atpF-atpH – Furtadoa mixta (MH644211)	23	No
			33	No
			39	Yes	20 tRNA (trnW, trnP missing), 51 CDS, 3rRNA (rrn3.5 missing)
		trnL-trnF – Furtadoa mixta (KU727627)	23	No
			33	No
			39	Yes	20 tRNA (trnW, trnP missing), 50 CDS, 3rRNA (rrn3.5 missing)
